# Supplementary material for: Gold nanoparticles as a potent radiosensitizer in neutron therapy
Source: PubMed Central journal article supplement (PMC5762518; doi:10.18632/oncotarget.19837), 2017-08-03
Supplement: oncotarget-08-112390-s001.pdf [file oncotarget-08-112390-s001.pdf]

# Gold nanoparticles as a potent radiosensitizer in neutron therapy

## SUPPLEMENTARY MATERIALS

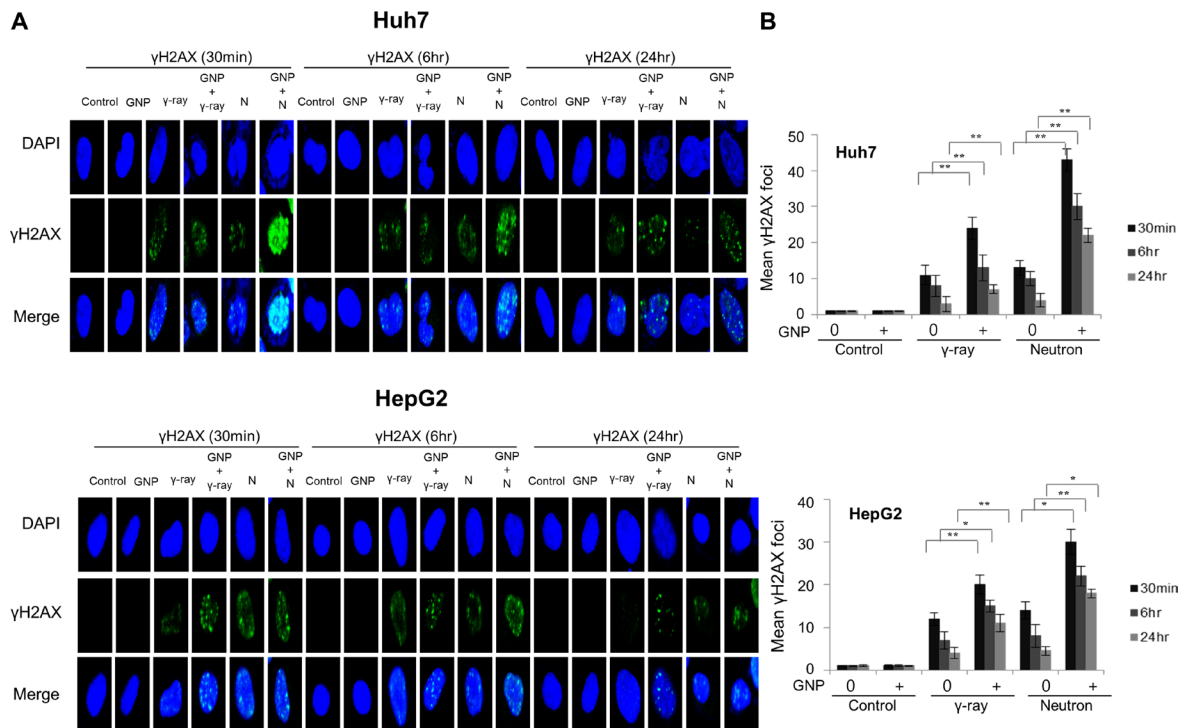

**Supplementary Figure 1: Gold nanoparticles enhance low dose radiation-induced DNA damage.** (A, B) Immunocytochemistry staining for phosphorylated H2AX, a marker of DNA damage response, in Huh7 and HepG2 cells exposed to  $\gamma$ -rays and neutron radiation (1 Gy, 1 GyE) in the absence or presence of gold nanoparticles, and results 30 min, 6 h and 24 h after irradiation.
